# Supplementary material for: Decoupling peroxyacetyl nitrate from ozone in Chinese outflows observed at Gosan Climate Observatory
Source: Copernicus journal article supplement (doi:10.5194/acp-2016-1107), 2017-01-25
Supplement: Supplementary file [file acp-2016-1107-AC4-supplement.pdf]

1  
2  
3  
4  
5  
6  
7  
8  
9  
10  
11  
12  
13  
14  
15  
16  
17  
18  
19  
20  
21  
22  
23  
24  
25

**Decoupling peroxyacetyl nitrate from ozone in Chinese outflows observed  
at Gosan Climate Observatory**

**Jihyun Han<sup>1\*</sup>, Meehye Lee<sup>1</sup>, Gangwoong Lee<sup>2</sup>, Louisa K. Emmons<sup>3</sup>**

<sup>1</sup>Department of Earth and Environmental Sciences, Korea University, Seoul,  
Republic of Korea

<sup>2</sup>Department of Environmental Science, Hankuk University of Foreign Studies, Yongin,  
Republic of Korea

<sup>3</sup>Atmospheric Chemistry Observations and Modeling Laboratory, National Center for  
Atmospheric Research (NCAR), Boulder, CO, USA

\*now at: Korea Environment Institute, Sejong, Republic of Korea

Correspondence to: M. Lee (meehye@korea.ac.kr )

Submitted to Atmospheric Chemistry and Physics

December 2016

26 **Abstract**

27 We measured peroxyacetyl nitrate (PAN) and other reactive species such as O<sub>3</sub>, NO<sub>2</sub>, CO,  
28 and SO<sub>2</sub> with aerosols including mass, organic carbon (OC), and elemental carbon (EC) in  
29 PM<sub>2.5</sub> and K<sup>+</sup> in PM<sub>1.0</sub> at Gosan Climate Observatory in Korea (33.17°N, 126.10°E) during  
30 October 10 to November 6, 2010. PAN was determined through fast gas chromatography  
31 with luminol chemiluminescence detection at 425 nm every 2 min. The PAN concentrations  
32 ranged from 0.1 (detection limit) to 2.4 ppbv with a mean of 0.6 ppbv. For all measurements,  
33 PAN was unusually better correlated with PM<sub>2.5</sub> (Pearson correlation coefficient,  $\gamma = 0.79$ )  
34 than with O<sub>3</sub> ( $\gamma = 0.67$ ). In particular, the O<sub>3</sub> level was highly elevated with SO<sub>2</sub> at midnight,  
35 along with a typical midday peak when air was transported rapidly from the Beijing areas.  
36 The PAN enhancement was most noticeable during the occurrence of haze under stagnant  
37 conditions. In Chinese outflows slowly transported over the Yellow Sea, PAN gradually  
38 increased up to 2.4 ppbv at night, in excellent correlation with a concentration increase of  
39 PM<sub>2.5</sub> OC and EC, PM<sub>2.5</sub> mass, and PM<sub>1.0</sub> K<sup>+</sup>. The high K<sup>+</sup> concentration and OC/EC ratio  
40 indicated that the air mass was impacted by biomass combustion. This study highlights PAN  
41 decoupling with O<sub>3</sub> in Chinese outflows and suggests PAN as a useful indicator for  
42 diagnosing continental outflows and assessing their perturbation on regional air quality in  
43 northeast Asia.

44

45 Key words: PAN, O<sub>3</sub>, PM<sub>2.5</sub>, Chinese outflow, Haze, Biomass combustion

## 46 1. Introduction

47 At the surface, ozone is primarily photochemically produced, and the contribution from the  
48 stratosphere is generally small. Ozone is formed through reactions of various precursors such  
49 as CO, CH<sub>4</sub>, volatile organic compounds (VOCs), and NO<sub>x</sub> (e.g., Brasseur et al., 1999; Jacob,  
50 2000; Nielsen et al., 1981). Likewise, peroxyacetyl nitrate (PAN) is a secondary product of  
51 urban air pollution and a significant oxidant in the atmosphere (e.g., Hansel and Wisthaler,  
52 2000; La Franchi et al., 2009; Lee et al., 2012; Liu et al., 2010; Roberts et al., 2007). PAN is  
53 solely produced by the photochemical reaction between the peroxyacetyl radical and nitrogen  
54 dioxide, and the peroxyacetyl radical is derived from the OH oxidation or photolysis of  
55 VOCs such as acetaldehyde, methylglyoxal, and acetone (e.g., Fischer et al., 2014; La  
56 Franchi et al., 2009; Lee et al., 2012). For this reason, PAN is a very useful indicator of  
57 photochemical air pollution. As thermal decomposition is a major PAN sink in the  
58 troposphere (Beine et al., 1997; Jacob, 2000; Kenley and Hendry, 1982; Talukdar et al., 1995),  
59 the lifetime of PAN depends on temperature. For example, the PAN lifetime is ~5 years at  
60 -26°C and 1 h at 20°C (Fischer et al., 2010; Zhang et al., 2011). At high altitudes above ~7  
61 km, photolysis becomes the most important loss process for PAN (Talukdar, et al., 1995).  
62 Besides, PAN is less soluble compared to nitric acid and is more easily transported to the free  
63 troposphere after it is released from scavenge in lower temperature (e.g., Zhu et al., 2017).  
64 Thus, PAN can be an indicator of NO<sub>y</sub> concentration in the free troposphere and a guide for  
65 the long-range transport of NO<sub>x</sub> in remote regions (Jacob, 1999).

66 In the past decades, PAN was measured not only in urban areas (Aneja et al., 1999;  
67 Gaffney et al., 1999; Grosjean et al., 2002; Lee et al., 2008; Tanimoto et al., 1999; Zhang et  
68 al., 2014) but also in background regions (Fischer et al., 2011; Kanaya et al., 2007; Lee et al.,  
69 2012; Tanimoto et al., 2002), onboard aircraft (Tereszchuk et al., 2013), and ships (Roberts et

70 al., 2007). PAN concentrations were in the range of a few ppbv in urban areas close to VOCs  
71 and NO<sub>x</sub> sources (Lee et al., 2008; Zhang et al., 2011). In [the most](#) remote regions, PAN  
72 [concentrations](#) were generally in the range of a few pptv (Gallagher et al., 1990; Mills et al.,  
73 2007; Muller and Rudolph, 1992; Staudt et al., 2003).

74 [Although NO<sub>x</sub> concentration has recently declined in China \(Gu et al., 2013; Liu et al.,](#)  
75 [2016a; Krotkov et al., 2016\), NO<sub>x</sub> and VOCs have gradually increased in East Asia,](#)  
76 [particularly China during the last couple of decades \(Akimoto, 2003; Liu et al., 2010; Ohara](#)  
77 [et al., 2007; Zhao et al., 2013\). It led to an increase in the concentrations of photochemical](#)  
78 [byproducts such as PAN and O<sub>3</sub> not only in East Asia \(Liu et al., 2010; Wang et al., 2010;](#)  
79 [Zhang et al., 2009; Zhang et al., 2011; Zhang et al., 2014\) but also in North America \(Fischer](#)  
80 [et al., 2010; Fischer et al., 2011; Jaffe et al., 2007; Zhang et al., 2008\). These results were](#)  
81 [also demonstrated by the GEOS-Chem model \(Zhang et al., 2008\). In addition to urban](#)  
82 [plumes, PAN was reported to be enhanced by biomass combustion \(Alvarado et al., 2010;](#)  
83 [Coheur et al., 2007; Zhu et al., 2015; Zhu et al., 2017\), such as open burning and use of](#)  
84 [biofuel, which is used to take place often in China after crop harvesting \(Cao et al., 2006;](#)  
85 [Duan et al., 2004\). Recent satellite studies have also observed the increased PAN in plumes](#)  
86 [associated with anthropogenic emissions in eastern China and boreal fires in Siberia \(Zhu et](#)  
87 [al., 2015; Zhu et al., 2017\). In this context, PAN is a useful indicator for diagnosing Chinese](#)  
88 [outflows and assessing their perturbation on regional air quality in the northwestern Pacific](#)  
89 [region.](#)

90 Gosan Climate Observatory (GCO) is an ideal place to monitor Asian outflows and their  
91 transformation and to estimate their impact on air quality over the northern Pacific region  
92 (Lee et al., 2007; Lim et al., 2012). In the present study, PAN was first measured  
93 continuously at GCO to characterize its variation and source in relation to O<sub>3</sub> and to

94 understand the influence of Chinese outflows on the regional air quality.

95

## 96 **2. Experiments**

97 PAN measurements were conducted at GCO (33.17°N, E126.10°E) on Jeju Island from  
98 October 19 to November 6, 2010. GCO is located on a cliff at the western edge of Jeju Island.

99 PAN was determined through fast gas chromatography (GC) with luminol  
100 chemiluminescence detection, which is described in detail elsewhere (Gaffney et al., 1998;  
101 Lee et al., 2008; Marley et al., 2004). Here, we briefly describe the measurement method.

102 Ambient air was pumped through a 1.6-m PFA tubing (1/4 inch outer diameter) from the  
103 roof of the two-story container into a six-port two-position switching injection valve  
104 (Cheminert C22, Valco Instruments (Houston, TX, USA)) at 100 ml/min controlled by Mass  
105 flow controller (Lee et al., 2012; Lee et al., 2008). The residence time of the inlet was less  
106 than 2 seconds. PAN and NO<sub>2</sub> (and peroxypropyl nitrate (PPN) if present) were separated  
107 along a 10-m capillary GC column (DB-1, J&W Scientific, Folsom, CA, USA), whose end  
108 was connected to a luminol cell where the column effluent reacted with luminol, giving off  
109 luminescent light (Lee et al., 2008; Lee et al., 2012). The concentrations of PAN and other  
110 species were determined from the chemiluminescence signals detected by a gated photon  
111 counter (HC135-01, Hamamatsu, Bridgewater, NJ, USA) at 425 nm, which was set at 800 V  
112 and operated at room temperature (Gaffney et al., 1998; Lee et al., 2012; Lee et al., 2008).

113 PAN was calibrated against standards synthesized by the nitration of peracetic acid in n-  
114 tridecane (Gaffney et al., 1984; Gregory, 1990; Lee et al., 2008). A few microliter aliquots of  
115 standard solution were injected through an injection valve and then mixed with zero air  
116 (99.999 %) in a 5 L Tedlar bag. After being left for a few minutes for equilibrium, it was  
117 injected into GC-luminol instrument and NO<sub>x</sub> chemiluminescence instrument with a

118 molybdenum converter (42C, Thermo Electron Corporation, Franklin, MA, USA). The  
119 calibration was completed within 5 minutes to prevent thermal decomposition of the PAN  
120 (Kourtidis et al., 1993; Lee et al., 2008). These calibration procedures were carried out on the  
121 assumption that the PAN was completely converted to NO in the molybdenum converter. The  
122 detection limit of PAN defined by  $3\sigma$  of the lowest standard was no greater than 100 pptv  
123 (Lee et al., 2008). The overall measurement uncertainty and precision was estimated to be 16 %  
124 and 5%, respectively (Lee et al., 2012). NO<sub>x</sub> instrument was calibrated with NO standard gas.

125 Gaseous species including O<sub>3</sub>, NO, NO<sub>2</sub>, CO, and SO<sub>2</sub> were measured by UV absorption,  
126 chemiluminescence with a molybdenum converter, non-dispersive infrared, and pulse UV  
127 fluorescence method, respectively (NIER, 2016a). The measurements were made in  
128 compliance with guidelines for installation and operation of an air pollution monitoring network  
129 (NIER, 2016b). Calibration was conducted before and after the experiment, following the  
130 regular checkup procedure. Detection limits of O<sub>3</sub>, NO<sub>x</sub>, CO, and SO<sub>2</sub> are 2 ppb, 0.1 ppb,  
131 0.05 ppm, 0.1 ppb, respectively (NIER, 2016b).

132 Aerosol species, including PM<sub>2.5</sub> mass and PM<sub>2.5</sub> OC and EC were measured and recorded  
133 along with meteorological parameters (relative humidity, temperature, and wind speed).  
134 Water-soluble ions of PM<sub>1.0</sub> were collected by a particle-into-liquid sampler and analyzed by  
135 ion chromatography. The detailed results of the aerosol measurements can be found in Shang  
136 et al. (2017).

137 For the air parcel at 850 m a.s.l., the three-day backward trajectories were calculated every  
138 hour using NOAA Air Resources Laboratory (ARL) Hybrid Single-Particle Lagrangian  
139 Integrated Trajectory (HYSPLIT) model (version 4) (Draxler and Rolph, 2012; Rolph, 2012,  
140 <http://www.arl.noaa.gov/ready/hysplit4.html>). In addition, O<sub>3</sub> and PAN concentrations were  
141 calculated using a global chemistry model, the Community Atmosphere Model with

142 Chemistry (CAM-Chem), a component of the Community Earth System Model (CESM)  
143 (Lamarque et al., 2012; Tilmes et al., 2015). The CAM-chem results shown here follow the  
144 configuration used for the HTAP2 (Hemispheric Transport of Air Pollution, Phase 2)  
145 intercomparison (e.g., Stjern et al., 2016). CAM-chem is nudged to observed meteorology  
146 (GEOS-5) to reproduce the actual period of the observations (Oct 2010). The emissions used  
147 in the model are the HTAP2 inventory (Janssens-Maenhout, et al., 2015), which include the  
148 "MIX" Asian emissions inventory. Biomass burning emissions are from the Global Fire  
149 Emissions Database (GFED3) (Randerson et al., 2013).

150

### 151 **3. Results**

152 In the present experiments, PAN concentrations range from 0.1 to 2.4 ppbv, with an  
153 average of 0.6 ppbv. This mean value is lower than those observed in other Asian megacities:  
154 Beijing (1.41 ppb in the summer), Pearl River Delta region (1.32 ppb in the summer), and  
155 Seoul (0.8 ppb in the early summer); similar to those of suburban areas in China, e.g.,  
156 Lanzhou (0.76 ppb in the summer); and higher than those of urban and rural sites in Japan,  
157 e.g., Tokyo (up to 0.6 ppb in the fall), Rishiri Island (~0.5 ppb in spring) or in the western  
158 coast of the US, e.g., Sacramento (0.45 ppb in the summer), Mt. Bachelor (0.144 ppb in the  
159 spring and early summer), off the western coast of the US (0.65 ppb in the spring), and over  
160 the remote North Pacific (total PAN < 0.3 ppb in spring) (Bertram et al., 2013; Fischer et al.,  
161 2011; La Franchi et al., 2009; Lee et al., 2008; Roberts et al., 2004; Tanimoto et al., 1999;  
162 Tanimoto et al., 2002; Wang et al., 2010; Zhang et al., 2009; Zhang et al., 2011). Because the  
163 PAN lifetime is greatly dependent on temperature, its concentration decreases with increasing  
164 distance from the source regions. The PAN concentrations calculated in this study thus lie in-  
165 between the levels for the East Asian megacities and the northern Pacific. The distributions of

166 all measured species, including PAN and O<sub>3</sub>, are presented in Fig. 1. In particular, there are  
167 several periods characterized by high concentrations of PAN, O<sub>3</sub>, and PM<sub>2.5</sub>. In terms of PAN,  
168 four periods are particularly interesting (Fig. 1). High O<sub>3</sub> concentrations were observed  
169 during October 31–November 2 [episode 1] but did not coincide with high PAN  
170 concentrations. During October 28–29 [episode 2], NO<sub>2</sub> was noticeably increased. On the  
171 other hand, PAN and O<sub>3</sub> concentrations were both high during October 20–21 [episode 3] and  
172 November 4–5 [episode 4]. Episodes 3 and 4 are characterized by haze, while episodes 1 and  
173 2 are characterized by urban influence in the Korean and Beijing outflows, respectively. Haze  
174 is reported by Korea Meteorological Administration (KMA) as a meteorological phenomenon  
175 when visibility is 1~ 10 km and relative humidity is less than 75 %.

176 In the present study, PAN correlates reasonably well with O<sub>3</sub> ( $\gamma = 0.67$ ) and even better  
177 with PM<sub>2.5</sub> ( $\gamma = 0.79$ ). In general, O<sub>3</sub> and PAN exhibit typical diurnal variation with a  
178 maximum recorded in the afternoon, which results in a good correlation between the two  
179 (Brasseur et al., 1999; Gaffney et al., 1999; Ridley et al., 1990; Schrimpf et al., 1995; Wang  
180 et al., 2010). In this study, however, the O<sub>3</sub> peak was often found in the early morning and  
181 late afternoon for several days (Fig. 1). Observing the diurnal variations in the entire PAN  
182 concentration measurement set (Fig. 2), the maximum was clearly recorded in the morning  
183 with the highest outliers, which is rather similar to that of PM<sub>2.5</sub>. The diurnal pattern of NO<sub>2</sub>  
184 shows little variation, even though its concentrations were increased in the morning along  
185 with PAN. This first measurement of PAN at GCO reveals that PAN is not always coupled  
186 with O<sub>3</sub>, which was not typically observed at remote sites in previous studies (e.g., Fischer et  
187 al., 2010; Lee et al., 2012).

188

#### 189 4. Discussion



#### 190 **4.1. Decoupling of PAN from O<sub>3</sub>**

191 To examine the detailed mechanism of the decoupling of PAN from O<sub>3</sub>, the daily  
192 maximum concentrations of PAN and O<sub>3</sub> were further explored. The recorded daily PAN  
193 maxima were generally in good correlation with O<sub>3</sub>, albeit the relationship did not seem to  
194 hold at high concentrations of PAN and O<sub>3</sub> (Fig. 3). The daily maxima were then categorized  
195 into four groups according to the time when each O<sub>3</sub> and PAN maximum was recorded: “O<sub>3</sub>  
196 day-PAN day,” “O<sub>3</sub> day-PAN night,” “O<sub>3</sub> night-PAN day,” and “O<sub>3</sub> night-PAN night.” The  
197 day interval started from 08:00 and ended at 18:00 (local time), based on the times of sunrise  
198 and sunset during the experiment period. While the high PAN concentrations were associated  
199 with the “O<sub>3</sub> day-PAN day” group (cross symbols in Fig. 3), the enhanced O<sub>3</sub> concentration  
200 was recorded in the “O<sub>3</sub> night-PAN night” group (star symbols in Fig. 3). The “O<sub>3</sub> night-PAN  
201 night” group unexpectedly held more data points than the “O<sub>3</sub> day-PAN day” group, even  
202 though the “O<sub>3</sub> night-PAN night” group concentrations were lower (Fig. 3). In addition, there  
203 were several days classified in the “O<sub>3</sub> night-PAN day” (marked by diamond) and “O<sub>3</sub> day-  
204 PAN night” groups, but with less frequency and lower concentrations. These results indicate  
205 that the decoupling of PAN from O<sub>3</sub> was primarily due to the elevated concentrations of O<sub>3</sub>  
206 and PAN at night. While PAN reached the maximum during the day on Oct 20 and Nov 5,  
207 their concentrations were increased from the previous day through the night. The four high  
208 PAN and O<sub>3</sub> episodes identified in this study fall under the category of “O<sub>3</sub> night-PAN night”  
209 or “O<sub>3</sub> day-PAN day”. These two cases will be further examined to identify the chemical and  
210 physical processes responsible for PAN being decoupled from O<sub>3</sub>, instead of being coupled  
211 with PM<sub>2.5</sub>. The overall characteristics of the four episodes are summarized in Table 1.

212

#### 213 **4.2. Export of O<sub>3</sub> from Asian continents (episodes 1 & 2)**

214 High O<sub>3</sub> concentrations were encountered around midnight on three consecutive days from

215 October 31 to November 2 (episode 1), during which SO<sub>2</sub> reached its maximum  
216 concentration (Fig. 1). The backward trajectories of air masses revealed that air passed  
217 through the Beijing area during this period (Fig. 4). The wind was strong (13.5 m/s on  
218 average) and the recorded O<sub>3</sub> maximum (80.6 ppbv) was concurrent with the PAN maximum  
219 (0.9 ppbv) around midnight on November 1st (Fig. 1).

220 All these results indicate that the air was heavily influenced by outflow from the Beijing  
221 area, as previously hypothesized (Lim et al., 2012), and that the nighttime enhancement of O<sub>3</sub>  
222 and PAN resulted from the fast transport of relatively less-aged urban plumes. Because the  
223 overall correlation between O<sub>3</sub> and PAN was the best with the highest daily  $\Delta O_3/\Delta PAN$   
224 among all cases discussed in this study, episode 1 likely represents an event of rapid transport  
225 from the Beijing area (Fig. 5a).

226 In previous studies, the nighttime enhancement of O<sub>3</sub> was observed at GCO (e.g., Lee et  
227 al., 2007) in association with pollutant-laden air coming from Beijing. Similarly, Banta et al.  
228 (1998) pointed out that the evening O<sub>3</sub> maximum was due to long-range transport of O<sub>3</sub> from  
229 nearby urban areas. Wang et al. (2011) reported that the O<sub>3</sub> lifetime was about two days in  
230 East China during the summer, which is sufficient time for air to travel to GCO. Therefore,  
231 the nighttime maximum of O<sub>3</sub> can be attributed to the export of O<sub>3</sub> from megacities in China.  
232 It causes PAN to be decoupled from O<sub>3</sub> because PAN levels remained low, even though there  
233 was good correlation between the two species. Another night maximum of O<sub>3</sub> was recorded  
234 on October 29. Note that NO<sub>x</sub> was highly elevated during October 28–29 (episode 2) (Fig. 1).  
235 However, O<sub>3</sub> level was relatively low, leading to the lowest daily  $\Delta O_3/\Delta PAN$  among all  
236 episodes. In this case, air masses passed through the Korean Peninsula, carrying low O<sub>3</sub> being  
237 titrated by high NO<sub>x</sub> (Brasseur et al., 1999; Jacobson, 2005). These two urban plumes are  
238 well contrasted in terms of O<sub>3</sub> and NO<sub>x</sub> levels (Table 1), depending on the degree of aging.

239

### 240 **4.3. PAN enhancement upon occurrence of haze (episodes 3 & 4)**

241 In this study, two haze events were observed in the very beginning (October 20–21;  
242 episode 3) and the end of the study period (November 4–5; episode 4). As the nighttime O<sub>3</sub>  
243 peak was attributed to the transport from nearby urban areas to Jeju Island, the two haze  
244 episodes were also observed in association with continental outflows. The first haze event  
245 occurred on October 18th and lingered until October 21st, during which O<sub>3</sub> concentrations  
246 were gradually elevated. A second peak was recorded around midnight of October 19th and  
247 20th, and the maximum was reached in the afternoon of October 20th (Figs. 1 and 3). In this  
248 episode, the maximum concentrations of O<sub>3</sub> and PAN were 78.9 ppbv and 2.0 ppbv,  
249 respectively, on October 29th, when the highest NO<sub>2</sub> concentration (12.7 ppbv) was observed  
250 under low wind speed (6.6 m/s daily average). The air mass trajectories suggest the influence  
251 of the Korean Peninsula, particularly the Seoul metropolitan area, in addition to East China  
252 (Fig. 4).

253 In the second haze event (episode 4), an air mass was slowly transported from East China,  
254 including the Jiangsu province, under stagnant condition which was developed by an  
255 anticyclone system (Fig. 4). We measured the highest concentrations of all aerosol species  
256 including the PM<sub>2.5</sub> mass as well as PAN and O<sub>3</sub>, which were 156 μg/m<sup>3</sup>, 2.4 ppbv, and 87.5  
257 ppbv, respectively. Other reactive gases such as CO, SO<sub>2</sub>, and NO<sub>2</sub> were also highly elevated.  
258 Note that PAN and O<sub>3</sub> gradually increased through the night, leading to a nighttime maximum  
259 of both species on November 4th. It is likely that the pre-formed PAN and O<sub>3</sub> were  
260 continuously transported into Gosan at night.

261 PAN is formed through the reaction of the peroxyacetyl radical and nitrogen dioxide (Eq. 1)  
262 and decomposed at high temperature (Eq. 2), returning these radicals. Unless the NO

263 concentration is high (Eq. 3), the peroxyacetyl radical recombines with NO<sub>2</sub>, producing PAN.  
264 Thus, the total lifetime of PAN depends on the NO<sub>2</sub>/NO ratio and temperature (Eq. 4)  
265 (Brasseur et al., 1999).

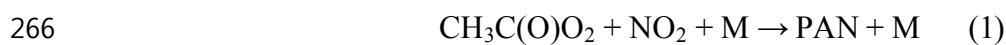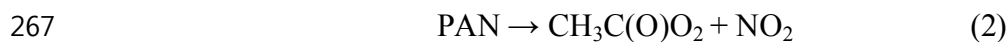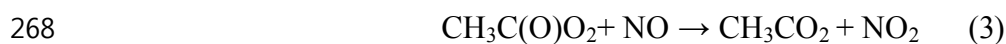

$$269 \quad T_{eff} = T_d \left( 1 + \frac{k_1[\text{NO}_2]}{k_2[\text{NO}]} \right) [\text{sec}^{-1}] \quad (4)$$

270 where  $T_d$  and  $T_{eff}$  indicate the lifetime against decomposition and the effective lifetime of  
271 PAN (Brasseur et al., 1999). The effective lifetime of PAN was estimated through Eq. 4 using  
272 the rate constants proposed by Brasseur et al. (1999), Jacobson (2005), and Maricq and  
273 Szente (1996).

274 During the haze event, NO was close to the detection limit, while NO<sub>2</sub> was greatly  
275 enhanced. Owing to the high NO<sub>2</sub>/NO ratio, the effective lifetime of PAN increased by 57  
276 times; this possibly contributed to the gradual increase in PAN through the night on  
277 November 4th. Fischer et al. (2014) also reported that, at night, PAN can be produced from  
278 the reaction of acetaldehyde with the nitrate radical.

279 Besides PM<sub>2.5</sub>, PAN was also well correlated with PM<sub>2.5</sub> OC and EC not only during this  
280 haze episode but also during the entire measurement period (Fig. 6a and b). Furthermore, the  
281 enhancement of PAN was concurrent with that of OC and K<sup>+</sup>, resulting in excellent  
282 correlation between them (Fig. 6b and d). In fact, the ΔOC/ΔEC ratio of episode 4 was much  
283 higher (7) than those of the other episodes (~2.5) (Fig. 6c). The fraction of PM<sub>2.5</sub> against  
284 PM<sub>2.5</sub> was also the highest in this episode, indicating significant contribution of secondary  
285 aerosols. These observations suggest that air masses were affected by biomass combustion  
286 (e.g., Ram et al., 2008, 2012; Saarikoski et al., 2008).

287 According to previous studies, PAN can be produced in plumes through biomass

288 combustion (Alvarado et al., 2010; Coheur et al., 2007; Liu et al., 2016b; Tereszchuk et al.,  
289 2013). In northeast China, open burnings related to agricultural activities frequently occur  
290 during the spring and fall (Duan et al., 2004; Yang et al., 2005). Kudo et al. (2014) also  
291 reported that, upon burning crop residue in Yangtze region, the levels of oxygenated VOCs  
292 were elevated together with NO<sub>x</sub>. In addition, biofuel is used for cooking and heating and as  
293 an energy source in China's industry (Cao et al., 2006).

294 Therefore, PAN is likely to increase when haze occurs and fine aerosols are transformed as  
295 air masses carrying combustion emissions are slowly transported from China over the Yellow  
296 Sea. Additionally, the results of this study imply that PAN can be used as a robust tracer for  
297 continental outflows in northeast Asia, to identify transport- and chemical transformation-  
298 dominant regimes. In a transport-dominant regime, O<sub>3</sub> export was distinguished by the  
299 highest levels of primary gaseous species such as SO<sub>2</sub> and relatively low levels of PAN. In  
300 contrast, fine aerosol species are enhanced in a chemical transformation regime, leading to  
301 haze events with relatively more enhanced PAN compared to O<sub>3</sub>.

302 Finally, the measured O<sub>3</sub> and PAN concentrations were compared to results from a global  
303 chemistry model CAM-Chem. In the model simulation, O<sub>3</sub> and PAN were highly  
304 underestimated during the episodes observed in Chinese outflows, although the variation  
305 around average level of O<sub>3</sub> and PAN was well captured (Fig. 7). The elevated PAN  
306 concentration was underestimated in the model (Oct 20–21 and Nov 4–5), especially when air  
307 was impacted by biomass combustion. The timing of the O<sub>3</sub> diurnal variability was captured  
308 by the model, although the magnitude of the variation was underestimated. These results  
309 reveal that the current understanding of Chinese outflow is still not sufficient, thereby causing  
310 uncertainty in estimating its effect on air quality in the northwestern Pacific Rim.

## 311 5. Conclusions

312 The first measurements of PAN, reactive gases, and aerosol species were conducted at  
313 GCO during October 19 to November 6, 2010. The average concentration of PAN was 0.6  
314 ppbv with a maximum of 2.4 ppbv, which was lower than those in major cities in East Asia  
315 but much higher than the background concentrations in other regions. In addition, PAN and  
316 O<sub>3</sub> concentrations were well correlated ( $\gamma = 0.67$ ). However, the comparison of the daily  
317 maxima of PAN and O<sub>3</sub> highlighted that they were not proportionally enhanced. That is,  
318 either PAN was relatively more elevated than O<sub>3</sub> or the highest O<sub>3</sub> was associated with low  
319 levels of PAN. Unexpectedly, both PAN and O<sub>3</sub> often reached their maxima at night. As a  
320 result, PAN was decoupled from O<sub>3</sub> and better correlated with the PM<sub>2.5</sub> mass ( $\gamma = 0.79$ ) than  
321 with O<sub>3</sub>. In this study, these high-concentration episodes were all encountered in association  
322 with continental outflows, and thus, two high-O<sub>3</sub> and two high-PAN events were recorded  
323 and investigated in detail.

324 During the O<sub>3</sub> episodes, both O<sub>3</sub> and PAN concentrations reached their maximum values at  
325 night. In episode 1 (Oct. 31 to Nov. 2), the O<sub>3</sub> concentration was increased to 80.6 ppbv, with  
326 a high SO<sub>2</sub> concentration under strong wind. It was a typical Beijing plume observed in the  
327 study region. In comparison, NO<sub>2</sub> was greatly increased in episode 2 (Oct. 28–29) when the  
328 air masses were affected by urban emissions from Korean Peninsula. Although the maximum  
329 O<sub>3</sub> level was lower during episode 2, these two cases demonstrated well how O<sub>3</sub> was exported  
330 from the East Asian continent.

331 The remaining two episodes were highlighted by enhanced PAN concentrations and  
332 characterized by haze occurrence. During episode 3 (Oct. 20–21), PAN and O<sub>3</sub> concentrations  
333 increased up to 2.0 ppbv and 78.9 ppbv, respectively, with high NO<sub>x</sub> levels, probably  
334 influenced by emissions from Korea. Episode 4 (Nov. 4–5) was characterized by the highest

335 concentrations of almost all measured species, including PAN, O<sub>3</sub>, PM<sub>2.5</sub> mass, and PM<sub>1.0</sub>  
336 species; the maximum recorded concentrations of PAN, O<sub>3</sub>, and PM<sub>2.5</sub> mass during this  
337 interval were 2.4 ppbv, 87.5 ppbv, and 156 μg/m<sup>3</sup>, respectively. Note that, along with PM<sub>2.5</sub>  
338 and O<sub>3</sub>, PAN was gradually increased through the night. In this episode, an air mass was  
339 slowly transported from eastern China. With depleted NO, the effective lifetime of PAN was  
340 greatly extended. In addition, PAN concentration showed good correlation with OC, EC, and  
341 K<sup>+</sup>; in fact, the correlation of PAN with K<sup>+</sup> was comparable to that of OC with K<sup>+</sup>. These  
342 results, in conjunction with the high AOC/EC (7), imply that the observed haze was mainly  
343 caused by the emissions produced by biomass combustion. These results suggest that PAN is  
344 a useful tool for distinguishing continental outflows that were typically observed in northeast  
345 Asia.

346 The comparison between the measured and calculated concentrations using the CAM-  
347 Chem-HTAP2 model showed that the model underestimated the O<sub>3</sub> and PAN levels in  
348 Chinese outflows, particularly for haze incidence. These results reveal that Chinese outflows  
349 are still poorly understood and not well captured in the model.

350

### 351 **Acknowledgments**

352 This study was funded by the Korea Meteorological Administration Research and  
353 Development Program under Grant KMIPA 2015-6020. The National Center for Atmospheric  
354 Research is funded by the National Science Foundation. The authors gratefully acknowledge  
355 the NOAA Air Resources Laboratory (ARL) for the provision of the HYSPLIT transport and  
356 dispersion model and/or READY website (<http://www.ready.noaa.gov>) used in this  
357 publication.

358 **References**

- 359 Akimoto, H.: Global air quality and pollution, *Science*, 302, 1716-1719,  
360 doi:10.1126/science.1092666, 2003.
- 361 Alvarado, M. J., Logan, J. A., Mao, J., Apel, E., Riemer, D., Blake, D., Cohen, R. C., Min, K.  
362 E., Perring, A. E., Browne, E. C., Wooldridge, P. J., Diskin, G. S., Sachse, G. W.,  
363 Fuelberg, H., Sessions, W. R., Harrigan, D. L., Huey, G., Liao, J., Case-Hanks, A.,  
364 Jimenez, J. L., Cubison, M. J., Vay, S. A., Weinheimer, A. J., Knapp, D. J., Montzka, D.  
365 D., Flocke, F. M., Pollack, I. B., Wennberg, P. O., Kurten, A., Crouse, J., Clair, J. M. S.,  
366 Wisthaler, A., Mikoviny, T., Yantosca, R. M., Carouge, C. C., and Le Sager, P.: Nitrogen  
367 oxides and PAN in plumes from boreal fires during ARCTAS-B and their impact on  
368 ozone: an integrated analysis of aircraft and satellite observations, *Atmos. Chem. Phys.*,  
369 10, 9739-9760, doi:10.5194/acp-10-9739-2010, 2010.
- 370 Aneja, V. P., Hartsell, B. E., Kim, D. S., and Grosjean, D.: Peroxyacetyl nitrate in Atlanta,  
371 Georgia: Comparison and analysis of ambient data for suburban and downtown  
372 locations, *J. Air & Waste Manage. Assoc.*, 49, doi: 177-184,  
373 10.1080/10473289.1999.10463786, 1999.
- 374 Banta, R. M., Senff, C. J., White, A. B., Trainer, M., McNider, R. T., Valente, R. J., Mayor, S.  
375 D., Alvarez, R. J., Hardesty, R. M., Parrish, D., and Fehsenfeld, F. C.: Daytime buildup  
376 and nighttime transport of urban ozone in the boundary layer during a stagnation episode,  
377 *J. Geophys. Res. Atmos.*, 103, 22519-22544, doi:10.1029/98jd01020, 1998.
- 378 Beine, H. J., Jaffe, D. A., Herring, J. A., Kelley, J. A., Krognes, T., and Stordal, F.: High-  
379 latitude springtime photochemistry .1. NO<sub>x</sub>, PAN and ozone relationships, *J. Atmos.*  
380 *Chem.*, 27, 127-153, doi:10.1023/a:1005869900567, 1997.
- 381 Bertram, T. H., Perring, A. E., Wooldridge, P. J., Dibb, J., Avery, M. A., and Cohen, R. C.: On  
382 the export of reactive nitrogen from Asia: NO<sub>x</sub> partitioning and effects on ozone, *Atmos.*  
383 *Chem. Phys.*, 13, 4617-4630, doi:10.5194/acp-13-4617-2013, 2013.
- 384 Brasseur, G. P., Orlando, J. J., and Tyndall, G. S.: *Atmospheric chemistry and global change*,  
385 Oxford University Press, New York, 235-347 pp., 1999.
- 386 Cao, G., Zhang, X., and Zheng, F.: Inventory of black carbon and organic carbon emissions  
387 from China, *Atmos. Environ.*, 40, 6516-6527, doi:10.1016/j.atmosenv.2006.05.070,  
388 2006.
- 389 Coheur, P. F., Herbin, H., Clerbaux, C., Hurtmans, D., Wespes, C., Carleer, M., Turquety, S.,  
390 Rinsland, C. P., Remedios, J., Hauglustaine, D., Boone, C. D., and Bernath, P. F.: ACE-  
391 FTS observation of a young biomass burning plume: first reported measurements of  
392 C<sub>2</sub>H<sub>4</sub>, C<sub>3</sub>H<sub>6</sub>O, H<sub>2</sub>CO and PAN by infrared occultation from space, *Atmos. Chem. Phys.*,  
393 7, 5437-5446, doi:10.5194/acp-7-5437-2007, 2007.
- 394 Draxler, R. R., and Rolph, G. D.: HYSPLIT (HYbrid Single-Particle Lagrangian Integrated  
395 Trajectory) Model access via NOAA ARL READY Website  
396 (<http://ready.arl.noaa.gov/HYSPLIT.php>), NOAA Air Resources Laboratory, Silver  
397 Spring, MD., 2012.
- 398 Duan, F., Liu, X., Yu, T., and Cachier, H.: Identification and estimate of biomass burning  
399 contribution to the urban aerosol organic carbon concentrations in Beijing, *Atmos.*  
400 *Environ.*, 38, 1275-1282, doi:10.1016/j.atmosenv.2003.11.037, 2004.



401 Fischer, E. V., Jaffe, D. A., Reidmiller, D. R., and Jaeglé, L.: Meteorological controls on  
 402 observed peroxyacetyl nitrate at Mount Bachelor during the spring of 2008, *J. Geophys.*  
 403 *Res.*, 115, D03302, doi:10.1029/2009jd012776, 2010.

404 Fischer, E. V., Jaffe, D. A., and Weatherhead, E. C.: Free tropospheric peroxyacetyl nitrate  
 405 (PAN) and ozone at Mount Bachelor: potential causes of variability and timescale for  
 406 trend detection, *Atmos. Chem. Phys.*, 11, 5641-5654, doi:10.5194/acp-11-5641-2011,  
 407 2011.

408 Fischer, E. V., Jacob, D. J., Yantosca, R. M., Sulprizio, M. P., Millet, D. B., Mao, J., Paulot, F.,  
 409 Singh, H. B., Roiger, A., Ries, L., Talbot, R. W., Dzepina, K., and Pandey, D. S.:  
 410 Atmospheric peroxyacetyl nitrate (PAN): a global budget and source attribution, *Atmos.*  
 411 *Chem. Phys.*, 14, 2679-2698, doi:10.5194/acp-14-2679-2014, 2014.

412 Gaffney, J. S., Fajer, R., and Senum, G. I.: An improved procedure for high purity gaseous  
 413 peroxyacetyl nitrate production: Use of heavy lipid solvents, *Atmos. Environ.*, 18, 215-  
 414 218, doi:10.1016/0004-6981(84)90245-2, 1984.

415 Gaffney, J. S., Bornick, R. M., Chen, Y. H., and Marley, N. A.: Capillary gas chromatographic  
 416 analysis of nitrogen dioxide and pans with luminol chemiluminescent detection, *Atmos.*  
 417 *Environ.*, 32, 1445-1454, doi:10.1016/S1352-2310(97)00098-8, 1998.

418 Gaffney, J. S., Marley, N. A., Cunningham, M. M., and Doskey, P. V.: Measurements of  
 419 peroxyacetyl nitrates (PANs) in Mexico City: implications for megacity air quality  
 420 impacts on regional scales, *Atmos. Environ.*, 33, 5003-5012, doi:10.1016/S1352-  
 421 2310(99)00263-0, 1999.

422 Gallagher, M. S., Carsey, T. P., and Farmer, M. L.: Peroxyacetyl nitrate in the North Atlantic  
 423 marine boundary layer, *Global Biogeochem. Cycle.*, 4, 297-308,  
 424 doi:10.1029/GB004i003p00297, 1990.

425 Gregory, G. L.: An intercomparison of airborne PAN measurements, *J. Geophys. Res.*, 95,  
 426 10077-10087, doi:10.1029/JD095iD07p10077, 1990.

427 Grosjean, E., Grosjean, D., Woodhouse, L. F., and Yang, Y.-J.: Peroxyacetyl nitrate and  
 428 peroxypropionyl nitrate in Porto Alegre, Brazil, *Atmos. Environ.*, 36, 2405-2419,  
 429 doi:10.1016/S1352-2310(01)00541-6, 2002.

430 [Gu, D., Wang, Y., Smeltzer, C., and Liu, Z.: Reduction in NOx Emission Trends over China:  
 431 Regional and Seasonal Variations, \*Environ. Sci. Technol.\*, 47, 12912–12919,  
 432 doi:10.1021/es401727e, 2013.](#)

433 Hansel, A., and Wisthaler, A.: A method for real-time detection of PAN, PPN and MPAN in  
 434 ambient air, *Geophys. Res. Lett.*, 27, 895-898, doi:10.1029/1999gl010989, 2000.

435 Jacob, D. J.: Introduction to atmospheric chemistry, 199-231 pp., 1999.

436 Jacob, D. J.: Heterogeneous chemistry and tropospheric ozone, *Atmos. Environ.*, 34, 2131-  
 437 2159, doi:10.1016/s1352-2310(99)00462-8, 2000.

438 Jacobson, M. Z.: Fundamentals of atmospheric modeling, Second edition, Cambridge, UK,  
 439 731-738 pp., 2005.

440 Jaffe, D. A., Thornton, J., Wolfe, G., Reidmiller, D., Fischer, E. V., Jacob, D. J., Zhang, L.,  
 441 Cohen, R., Singh, H., Weinheimer, A., and Flocke, F.: Can we detect an Influence over  
 442 North America from Increasing Asian NOx Emissions?, *Eos Trans, AGU*, 88, 2007.

443 Janssens-Maenhout, G., Crippa, M., Guizzardi, D., Dentener, F., Muntean, M., Pouliot, G.,  
444 Keating, T., Zhang, Q., Kurokawa, J., Wankmüller, R., Denier van der Gon, H., Kuenen,  
445 J. J. P., Klimont, Z., Frost, G., Darras, S., Koffi, B., and Li, M.: HTAP\_v2.2: a mosaic of  
446 regional and global emission grid maps for 2008 and 2010 to study hemispheric  
447 transport of air pollution, *Atmos. Chem. Phys.*, 15, 11411-11432, doi:10.5194/acp-15-  
448 11411-2015, 2015.

449 Jung, M., [Variations of HONO at Gosan in March, 2011, master thesis, Korea University,](#)  
450 [2013.](#)

451 Kanaya, Y., Tanimoto, H., Matsumoto, J., Furutani, H., Hashimoto, S., Komazaki, Y., Tanaka,  
452 S., Yokouchi, Y., Kato, S., Kajii, Y., and Akimoto, H.: Diurnal variations in H<sub>2</sub>O<sub>2</sub>, O<sub>3</sub>,  
453 PAN, HNO<sub>3</sub> and aldehyde concentrations and NO/NO<sub>2</sub> ratios at Rishiri Island, Japan:  
454 Potential influence from iodine chemistry, *Sci. Total Envir.*, 376, 185-197,  
455 doi:10.1016/j.scitotenv.2007.01.073, 2007.

456 Kenley, R. A., and Hendry, D. G.: Generation of peroxy radicals from peroxy nitrates  
457 (ROONO<sub>2</sub>). Decomposition of peroxybenzoyl nitrate (PBzN), *J. Am. Chem. Soc.*, 104,  
458 220-224, doi:10.1021/ja00365a040, 1982.

459 Kourtidis, K. A., Fabian, P., Zerefos, C., and Rappenglück, B.: Peroxyacetyl nitrate (PAN),  
460 peroxypropionyl nitrate (PPN) and PAN/ozone ratio measurements at three sites in  
461 Germany, *Tellus B*, 45, 442-457, doi:10.1034/j.1600-0889.1993.t01-3-00004.x, 1993.

462 Krotkov, N. A., McLinden, C. A., Li, C., Lamsal, L. N., Celarier, E. A., Marchenko, S. V.,  
463 Swartz, W. H., Bucsela, E. J., Joiner, J., Duncan, B. N., Boersma, K. F., Veefkind, J. P.,  
464 Levelt, P. F., Fioletov, V. E., Dickerson, R. R., He, H., Lu, Z., and Streets, D. G.: Aura  
465 OMI observations of regional SO<sub>2</sub> and NO<sub>2</sub> pollution changes from 2005 to 2015,  
466 *Atmos. Chem. Phys.*, 16, 4605–4629, doi:10.5194/acp-16-4605-2016, 2016.

467 Kudo, S., Tanimoto, H., Inomata, S., Saito, S., Pan, X., Kanaya, Y., Taketani, F., Wang, Z.,  
468 Chen, H., Dong, H., Zhang, M., and Yamaji, K.: Emissions of nonmethane volatile  
469 organic compounds from open crop residue burning in the Yangtze River Delta region,  
470 China, *J. Geophys. Res.*, 119, 7684–7698, doi:10.1002/2013JD021044, 2014.

471 LaFranchi, B. W., Wolfe, G. M., Thornton, J. A., Harrold, S. A., Browne, E. C., Min, K. E.,  
472 Wooldridge, P. J., Gilman, J. B., Kuster, W. C., Goldan, P. D., De Gouw, J. A., McKay,  
473 M., Goldstein, A. H., Ren, X., Mao, J., and Cohen, R. C.: Closing the peroxy acetyl  
474 nitrate budget: Observations of acyl peroxy nitrates (PAN, PPN, and MPAN) during  
475 BEARPEX 2007, *Atmos. Chem. Phys.*, 9, 7623-7641, doi:10.5194/acp-9-7623-2009,  
476 2009.

477 Lamarque, J. F., Emmons, L. K., Hess, P. G., Kinnison, D. E., Tilmes, S., Vitt, F., Heald, C. L.,  
478 Holland, E. A., Lauritzen, P. H., Neu, J., Orlando, J. J., Rasch, P. J., and Tyndall, G. K.:  
479 CAM-chem: description and evaluation of interactive atmospheric chemistry in the  
480 Community Earth System Model, *Geosci. Model Dev.*, 5, 369-411, doi:10.5194/gmd-5-  
481 369-2012, 2012.

482 Lee, G., Jang, Y., Lee, H., Han, J.-S., Kim, K.-R., and Lee, M.: Characteristic behavior of  
483 peroxyacetyl nitrate (PAN) in Seoul megacity, Korea, *Chemosphere*, 73, 619-628,  
484 doi:10.1016/j.chemosphere.2008.05.060, 2008.

485 Lee, G., Choi, H.-S., Lee, T., Choi, J., Park, J. S., and Ahn, J. Y.: Variations of regional  
486 background peroxyacetyl nitrate in marine boundary layer over Baengyeong Island,

- 487 South Korea, *Atmos. Environ.*, 61, 533-541, doi:10.1016/j.atmosenv.2012.07.075, 2012.
- 488 Lee, M., Song, M., Moon, K. J., Han, J. S., Lee, G., and Kim, K.-R.: Origins and chemical  
489 characteristics of fine aerosols during the northeastern Asia regional experiment  
490 (Atmospheric Brown Cloud-East Asia Regional Experiment 2005), *J. Geophys. Res.*,  
491 112, D22S29, doi:10.1029/2006jd008210, 2007.
- 492 Li, M., Zhang, Q., Kurokawa, J., Woo, J. H., He, K. B., Lu, Z., Ohara, T., Song, Y., Streets, D.  
493 G., Carmichael, G. R., Cheng, Y. F., Hong, C. P., Huo, H., Jiang, X. J., Kang, S. C., Liu,  
494 F., Su, H., and Zheng, B.: MIX: a mosaic Asian anthropogenic emission inventory for  
495 the MICS-Asia and the HTAP projects, *Atmos. Chem. Phys. Discuss.*, 2015, 34813-  
496 34869, doi:10.5194/acpd-15-34813-2015, 2015.
- 497 Lim, S., Lee, M., Lee, G., Kim, S., Yoon, S., and Kang, K.: Ionic and carbonaceous  
498 compositions of PM<sub>10</sub>, PM<sub>2.5</sub> and PM<sub>1.0</sub> at Gosan ABC Superstation and their ratios as  
499 source signature, *Atmos. Chem. Phys.*, 12, 2007-2024, doi:10.5194/acp-12-2007-2012,  
500 2012.
- 501 Liu, F., Zhang, Q., A., van der A, R. J., Zheng, B., Tong, D., Yan, L., Zheng, Y., and He, K.:  
502 Recent reduction in NO<sub>x</sub> emissions over China: synthesis of satellite observations and  
503 emission inventories, *Environmental Research Letters*, 11, 114002, doi:10.1088/1748-  
504 9326/11/11/114002, 2016a.
- 505 Liu, Z., Wang, Y., Gu, D., Zhao, C., Huey, L. G., Stickel, R., Liao, J., Shao, M., Zhu, T., Zeng,  
506 L., Liu, S.-C., Chang, C.-C., Amoroso, A., and Costabile, F.: Evidence of reactive  
507 aromatics as a major source of peroxy acetyl nitrate over China, *Environ. Sci. Technol.*,  
508 44, 7017-7022, doi:10.1021/es1007966, 2010.
- 509 Liu, X., Zhang, Y., Huey, L. G., Yokelson, R. J., Wang, Y., Jimenez, J. L., Campuzano-Jost, P.,  
510 Beyersdorf, A. J., Blake, D. R., Choi, Y., St. Clair, J. M., Crounse, J. D., Day, D. A.,  
511 Diskin, G. S., Fried, A., Hall, S. R., Hanisco, T. F., King, L. E., Meinardi, S., Mikoviny,  
512 T., Palm, B. B., Peischl, J., Perring, A. E., Pollack, I. B., Ryerson, T. B., Sachse, G.,  
513 Schwarz, J. P., Simpson, I. J., Tanner, D. J., Thornhill, K. L., Ullmann, K., Weber, R. J.,  
514 Wennberg, P. O., Wisthaler, A., Wolfe, G. M., and Ziemba, L. D.: Agricultural fires in  
515 the southeastern U.S. during SEAC4RS: Emissions of trace gases and particles and  
516 evolution of ozone, reactive nitrogen, and organic aerosol, *J. Geophys. Res.- Atmos.*,  
517 121, 7383-7414, doi:10.1002/2016JD025040, 2016b.
- 518 Maricq, M. M., and Szente, J. J.: Temperature-dependent study of the CH<sub>3</sub>C(O)O<sub>2</sub> + NO  
519 reaction, *J. Phys. Chem.*, 100, 12380-12385, doi:10.1021/jp960792c, 1996.
- 520 Marley, N. A., Gaffney, J. S., White, R. V., Rodriguez-Cuadra, L., Herndon, S. E., Dunlea, E.,  
521 Volkamer, R. M., Molina, L. T., and Molina, M. J.: Fast gas chromatography with  
522 luminol chemiluminescence detection for the simultaneous determination of nitrogen  
523 dioxide and peroxyacetyl nitrate in the atmosphere, *Rev. Sci. Instr.*, 75, 4595-4605,  
524 doi:10.1063/1.1805271, 2004.
- 525 Mills, G. P., Sturges, W. T., Salmon, R. A., Bauguitte, S. J. B., Read, K. A., and Bandy, B. J.:  
526 Seasonal variation of peroxyacetyl nitrate (PAN) in coastal Antarctica measured with a  
527 new instrument for the detection of sub-part per trillion mixing ratios of PAN, *Atmos.*  
528 *Chem. Phys.*, 7, 4589-4599, doi:10.5194/acp-7-4589-2007, 2007.
- 529 Muller, K. P., and Rudolph, J.: Measurements of peroxyacetyl nitrate in the marine boundary  
530 layer over the Atlantic, *J. Atmos. Chem.*, 15, 361-367, doi:10.1007/BF00115405, 1992.

- 531 Nielsen, T., Samuelsson, U., Grennfelt, P., and Thomsen, E. L.: Peroxyacetyl nitrate in long-  
532 range transported polluted air, *Nature*, 293, 553-555, doi:10.1038/293553a0, 1981.
- 533 NIER, Annual Report of Ambient Air Quality in Korea, 2015, National Institute of  
534 Environmental Research, Inchon, Korea, 350pp., 2016a (in Korean).
- 535 [NIER, Guidelines for installation and operation of air pollution monitoring network, National  
536 Institute of Environmental Research, Inchon, Korea, 427 pp., 2016b \(in Korean\).](#)
- 537 Ohara, T., Akimoto, H., Kurokawa, J., Horii, N., Yamaji, K., Yan, X., and Hayasaka, T.: An  
538 Asian emission inventory of anthropogenic emission sources for the period 1980-2020,  
539 *Atmos. Chem. Phys.*, 7, 4419-4444, doi:10.5194/acp-7-4419-2007, 2007.
- 540 Ram, K., Sarin, M. M., and Hegde, P.: Atmospheric abundances of primary and secondary  
541 carbonaceous species at two high-altitude sites in India: Sources and temporal variability,  
542 *Atmos. Environ.*, 42, 6785-6796, doi:10.1016/j.atmosenv.2008.05.031, 2008.
- 543 Ram, K., Sarin, M. M., and Tripathi, S. N.: Temporal trends in atmospheric PM<sub>2.5</sub>, PM<sub>10</sub>,  
544 elemental carbon, organic carbon, water-soluble organic carbon, and optical properties:  
545 Impact of biomass burning emissions in the Indo-Gangetic Plain, *Environ. Sci. Technol.*,  
546 46, 686-695, doi:10.1021/es202857w, 2012.
- 547 Randerson, J. T., van der Werf, G. R., Giglio, L., Collatz, G. J., and Kasibhatla, P. S.: Global  
548 Fire Emissions Database, Version 3 (GFEDv3.1). Data set. Available on-line  
549 [<http://daac.ornl.gov/>] from Oak Ridge National Laboratory Distributed Active Archive  
550 Center, Oak Ridge, Tennessee, USA. doi:10.3334/ORNLDAAC/1191, 2013.
- 551 Ridley, B. A., Shetter, J. D., Gandrud, B. W., Salas, L. J., Singh, H. B., Carroll, M. A., Hubler,  
552 G., Albritton, D. L., Hastie, D. R., Schiff, H. I., Mackay, G. I., Karechi, D. R., Davis, D.  
553 D., Bradshaw, J. D., Rodgers, M. O., Sandholm, S. T., Torres, A. L., Condon, E. P.,  
554 Gregory, G. L., and Beck, S. M.: Ratios of peroxyacetyl nitrate to active nitrogen  
555 observed during aircraft flights over the Eastern Pacific Oceans and continental United-  
556 States, *J. Geophys. Res.*, 95, 10179-10192, doi:10.1029/JD095iD07p10179, 1990.
- 557 Roberts, J. M., Flocke, F., Chen, G., de Gouw, J., Holloway, J. S., Hübler, G., Neuman, J. A.,  
558 Nicks, D. K., Nowak, J. B., Parrish, D. D., Ryerson, T. B., Sueper, D. T., Warneke, C.,  
559 and Fehsenfeld, F. C.: Measurement of peroxy-carboxylic nitric anhydrides (PANs)  
560 during the ITCT 2K2 aircraft intensive experiment, *J. Geophys. Res.- Atmos.*, 109,  
561 D23S21, doi:10.1029/2004JD004960, 2004.
- 562 Roberts, J. M., Marchewka, M., Bertman, S. B., Sommariva, R., Warneke, C., de Gouw, J.,  
563 Kuster, W., Goldan, P., Williams, E., Lerner, B. M., Murphy, P., and Fehsenfeld, F. C.:  
564 Measurements of PANs during the New England Air Quality Study 2002, *J. Geophys.*  
565 *Res.*, 112, D20306, doi:10.1029/2007JD008667, 2007.
- 566 Rolph, G. D.: Real-time Environmental Applications and Display sYstem (READY) Website  
567 (<http://ready.arl.noaa.gov>). NOAA Air Resources Laboratory, Silver Spring, MD. , 2012.
- 568 Saarikoski, S., Timonen, H., Saarnio, K., Aurela, M., Järvi, L., Keronen, P., Kerminen, V. M.,  
569 and Hillamo, R.: Sources of organic carbon in fine particulate matter in northern  
570 European urban air, *Atmos. Chem. Phys.*, 8, 6281-6295, doi:10.5194/acp-8-6281-2008,  
571 2008.
- 572 Schrimpf, W., Muller, K. P., Johnen, F. J., Lienaerts, K., and Rudolph, J.: An optimized  
573 method for airborne peroxyacetyl nitrate (PAN) measurements, *J. Atmos. Chem.*, 22,

574 303-317, doi:10.1007/bf00696640, 1995.

575 Shang, X., Lee, M., Han, J., Kang, E., Gustafsson, Ö., and Chang, L.-S.: Identification and  
576 chemical characteristics of distinctive Chinese outflow plumes associated with enhanced  
577 submicron aerosols at Gosan Climate Observatory, submitted at *Aerosol Air Qual. Res.*

578 Staudt, A. C., Jacob, D. J., Ravetta, F., Logan, J. A., Bachiochi, D., Sandholm, S., Ridley, B.,  
579 Singh, H. B., and Talbot, B.: Sources and chemistry of nitrogen oxides over the tropical  
580 Pacific, *J. Geophys. Res.*, 108, 8239, doi:10.1029/2002JD002139, 2003.

581 Stjern, C. W., Samset, B. H., Myhre, G., Bian, H., Chin, M., Davila, Y., Dentener, F.,  
582 Emmons, L., Flemming, J., Haslerud, A. S., Henze, D., Jonson, J. E., Kucsera, T., Lund,  
583 M. T., Schulz, M., Sudo, K., Takemura, T., and Tilmes, S.: Global and regional radiative  
584 forcing from 20% reductions in BC, OC and SO<sub>4</sub> – an HTAP2 multi-model study,  
585 *Atmos. Chem. Phys.*, 16, 13579-13599, doi:10.5194/acp-16-13579-2016, 2016.

586 Talukdar, R. K., Burkholder, J. B., Schmoltner, A. M., Roberts, J. M., Wilson, R. R., and  
587 Ravishankara, A. R.: Investigation of the loss processes for peroxyacetyl nitrate in the  
588 atmosphere: UV photolysis and reaction with OH, *J. Geophys. Res.*, 100, 14163-14173,  
589 doi:10.1029/95JD00545, 1995.

590 Tanimoto, H., Hirokawa, J., Kajii, Y., and Akimoto, H.: A new measurement technique of  
591 peroxyacetyl nitrate at parts per trillion by volume levels: Gas chromatography/negative  
592 ion chemical ionization mass spectrometry, *J. Geophys. Res.*, 104(17), 21, 343-21, 354,  
593 doi:10.1029/1999JD900345, 1999.

594 Tanimoto, H., H. Furutani, S. Kato, J. Matsumoto, Y. Makide, and H. Akimoto, Seasonal  
595 cycles of ozone and oxidized nitrogen species in northeast Asia, 1, Impact of regional  
596 climatology and photochemistry observed during RISOTTO 1999-2000, *J. Geophys.*  
597 *Res.*, 107(D24), 4747, doi:10.1029/2001JD001496, 2002.

598 Tanimoto, H., K. Matsumoto, and M. Uematsu, Ozone–CO correlations in Siberian wildfire  
599 plumes observed at Rishiri Island, *SOLA*, 4, 65-68, doi:10.2151/sola.2008-017, 2008.

600 Tereszchuk, K. A., Moore, D. P., Harrison, J. J., Boone, C. D., Park, M., Remedios, J. J.,  
601 Randel, W. J., and Bernath, P. F.: Observations of peroxyacetyl nitrate (PAN) in the  
602 upper troposphere by the Atmospheric Chemistry Experiment-Fourier Transform  
603 Spectrometer (ACE-FTS), *Atmos. Chem. Phys.*, 13, 5601-5613, doi:10.5194/acp-13-  
604 5601-2013, 2013.

605 Tilmes, S., Lamarque, J. F., Emmons, L. K., Kinnison, D. E., Ma, P. L., Liu, X., Ghan, S.,  
606 Bardeen, C., Arnold, S., Deeter, M., Vitt, F., Ryerson, T., Elkins, J. W., Moore, F.,  
607 Spackman, J. R., and Val Martin, M.: Description and evaluation of tropospheric  
608 chemistry and aerosols in the Community Earth System Model (CESM1.2), *Geosci.*  
609 *Model Dev.*, 8, 1395-1426, doi:10.5194/gmd-8-1395-2015, 2015.

610 Villena, G., Bejan, I., Kurtenbach, R., Wiesen, P., and Kleffmann, J.: Interferences of  
611 commercial NO<sub>2</sub> instruments in the urban atmosphere and in a smog chamber, *Atmos.*  
612 *Meas. Tech.*, 5, 149-159, doi:10.5194/amt-5-149-2012, 2012.

613 Wang, B., Shao, M., Roberts, J. M., Yang, G., Yang, F., Hu, M., Zeng, L., Zhang, Y., and  
614 Zhang, J.: Ground-based on-line measurements of peroxyacetyl nitrate (PAN) and  
615 peroxypropionyl nitrate (PPN) in the Pearl River Delta, China, *Int. J. Environ. Anal.*  
616 *Chem.*, 90, 548-559, doi:10.1080/03067310903194972, 2010.



- 617 Wang, Y., Zhang, Y., Hao, J., and Luo, M.: Seasonal and spatial variability of surface ozone  
618 over China: contributions from background and domestic pollution, *Atmos. Chem. Phys.*,  
619 11, 3511-3525, doi:10.5194/acp-11-3511-2011, 2011.
- 620 Yang, F., He, K., Ye, B., Chen, X., Cha, L., Cadle, S. H., Chan, T., and Mulawa, P. A.: One-  
621 year record of organic and elemental carbon in fine particles in downtown Beijing and  
622 Shanghai, *Atmos. Chem. Phys.*, 5, 1449-1457, doi:10.5194/acp-5-1449-2005, 2005.
- 623 Zhang, H., Xu, X., Lin, W., and Wang, Y.: Wintertime peroxyacetyl nitrate (PAN) in the  
624 megacity Beijing: Role of photochemical and meteorological processes, *J. Environ. Sci.*,  
625 26, 83-96, doi:10.1016/S1001-0742(13)60384-8, 2014.
- 626 Zhang, J. B., Xu, Z., Yang, G., and Wang, B.: Peroxyacetyl nitrate (PAN) and  
627 peroxypropionyl nitrate (PPN) in urban and suburban atmospheres of Beijing, China,  
628 *Atmos. Chem. Phys. Discuss.*, 11, 8173-8206, doi:10.5194/acpd-11-8173-2011, 2011.
- 629 Zhang, J. M., Wang, T., Ding, A. J., Zhou, X. H., Xue, L. K., Poon, C. N., Wu, W. S., Gao, J.,  
630 Zuo, H. C., Chen, J. M., Zhang, X. C., and Fan, S. J.: Continuous measurement of  
631 peroxyacetyl nitrate (PAN) in suburban and remote areas of western China, *Atmos.*  
632 *Environ.*, 43, 228-237, doi:10.1016/j.atmosenv.2008.09.070, 2009.
- 633 Zhang, L., Jacob, D. J., Boersma, K. F., Jaffe, D. A., Olson, J. R., Bowman, K. W., Worden, J.  
634 R., Thompson, A. M., Avery, M. A., Cohen, R. C., Dibb, J. E., Flock, F. M., Fuelberg, H.  
635 E., Huey, L. G., McMillan, W. W., Singh, H. B., and Weinheimer, A. J.: Transpacific  
636 transport of ozone pollution and the effect of recent Asian emission increases on air  
637 quality in North America: An integrated analysis using satellite, aircraft, ozonesonde,  
638 and surface observations, *Atmos. Chem. Phys.*, 8, 6117-6136, doi:10.5194/acp-8-6117-  
639 2008, 2008.
- 640 Zhao, B., Wang, S. X., Liu, H., Xu, J. Y., Fu, K., Klimont, Z., Hao, J. M., He, K. B., Cofala, J.,  
641 and Amann, M.: NO<sub>x</sub> emissions in China: historical trends and future perspectives,  
642 *Atmos. Chem. Phys.*, 13, 9869-9897, doi:10.5194/acp-13-9869-2013, 2013.
- 643 Zhu, L., Fischer, E. V., Payne, V. H., Worden, J. R., and Jiang, Z.: TES observations of the  
644 interannual variability of PAN over Northern Eurasia and the relationship to springtime  
645 fires, *Geophys. Res. Lett.*, 42, 7230-7237, doi:10.1002/2015GL065328, 2015.
- 646 Zhu, L., Payne, V. H., Walker, T. W., Worden, J. R., Jiang, Z., Kulawik, S. S., and Fischer, E.  
647 V.: PAN in the eastern Pacific free troposphere: A satellite view of the sources,  
648 seasonality, interannual variability, and timeline for trend detection, *J. Geophys. Res.-*  
649 *Atmos.*, 122, 3614-3629, doi:10.1002/2016JD025868, 2017.

650 **Tables**

651

652 Table 1. Chemical and meteorological characteristics of the four episodes.

|                                        | Episode 1             | Episode 2             | Episode 3               | Episode 4               |
|----------------------------------------|-----------------------|-----------------------|-------------------------|-------------------------|
| Type                                   | Transport dominant    | Transport dominant    | Chemical transformation | Chemical transformation |
| Event                                  | O <sub>3</sub> export | O <sub>3</sub> export | Haze                    | Haze                    |
| O <sub>3</sub> (ppbv)                  | 60.2 (80.6)           | 45.6 (62.8)           | 59.7 (78.9)             | 61.8 (87.5)             |
| PAN (ppbv)                             | 0.5 (0.9)             | 0.5 (0.8)             | 1.2 (2.0)               | 1.3 (2.4)               |
| PM <sub>2.5</sub> (µg/m <sup>3</sup> ) | 34 (62)               | 23 (36)               | 50 (76)                 | 77 (156)                |
| SO <sub>2</sub> (ppbv)                 | 4.3 (12.9)            | 2.0 (4.4)             | 2.6 (5.4)               | 4.4 (9.5)               |
| NO <sub>2</sub> (ppbv)                 | 3.7 (7.3)             | 6.2 (12.1)            | 6.2 (12.7)              | 6.1 (9.9)               |
| Wind Speed (m/s)                       | 13.5 (16.0)           | 9.5 (16.1)            | 6.6 (10.2)              | 5.0 (7.7)               |

653 \*Measurements are given for the average with the maximum in the parenthesis.

654 **Figure Captions**

655

656 Figure 1. Temporal variations (against local time) of measured species, including PAN, PM<sub>2.5</sub>,  
657 O<sub>3</sub>, NO<sub>2</sub>, NO, SO<sub>2</sub>, and, CO, and meteorological parameters, including relative  
658 humidity, temperature, and wind speed in fall 2010. Episodes 1–4, described in the  
659 main text, are shaded in blue and yellow.

660 Figure 2. Diurnal variations in the concentrations of O<sub>3</sub>, NO<sub>2</sub>, PAN, and PM<sub>2.5</sub>, measured at  
661 GCO in the fall of 2010 (5 min data of O<sub>3</sub>, NO<sub>2</sub>, 2 min data of PAN, and 1 h data of  
662 PM<sub>2.5</sub>).

663 Figure 3. Comparison of O<sub>3</sub> with the PAN daily maxima. The time when the daily maximum  
664 appears is classified as daytime (08–18 h) and nighttime (the rest) based on the  
665 time of sunrise and sunset. Numerals indicate the days.

666 Figure 4. The three-day NOAA HYSPLIT backward trajectories of air masses for every one  
667 hour observed at GCO during episode 1 (Oct. 31 to Nov. 2), episode 2 (Oct. 28–29),  
668 episode 3 (Oct. 20–21), and episode 4 (Nov. 4–5). They are colored according to  
669 the level of (a) PAN, (b) O<sub>3</sub>, (c) NO<sub>2</sub>, and (d) PM<sub>2.5</sub> at GCO at the time of the  
670 trajectory initialization. The trajectories north of 50°N are not shown. For these  
671 horizontal trajectories, (e) vertical heights are given.

672 Figure 5. Correlations among PAN, PM<sub>2.5</sub>, O<sub>3</sub>, and NO<sub>2</sub>: (a) O<sub>3</sub> and PAN, (b) NO<sub>2</sub> and PAN,  
673 and (c) O<sub>3</sub> and PAN. The lines in (a) and (b) represent the linear regression for each  
674 episode.

675 Figure 6. Correlations among PAN, K<sup>+</sup> ion of PM<sub>1.0</sub>, and carbon components of PM<sub>2.5</sub> for  
676 three cases: (a) PM<sub>2.5</sub> mass and PAN, (b) PM<sub>2.5</sub> OC and PAN, (d) PM<sub>2.5</sub> OC and EC,  
677 and (d) PM<sub>1.0</sub> K<sup>+</sup> and PAN. The lines represent the linear regression for each  
678 episode.

679 Figure 7. Comparison between the observed and calculated (a) PAN and (b) O<sub>3</sub>  
680 concentrations by CAM-chem model. Time is given in local time and four episodes  
681 are shaded.



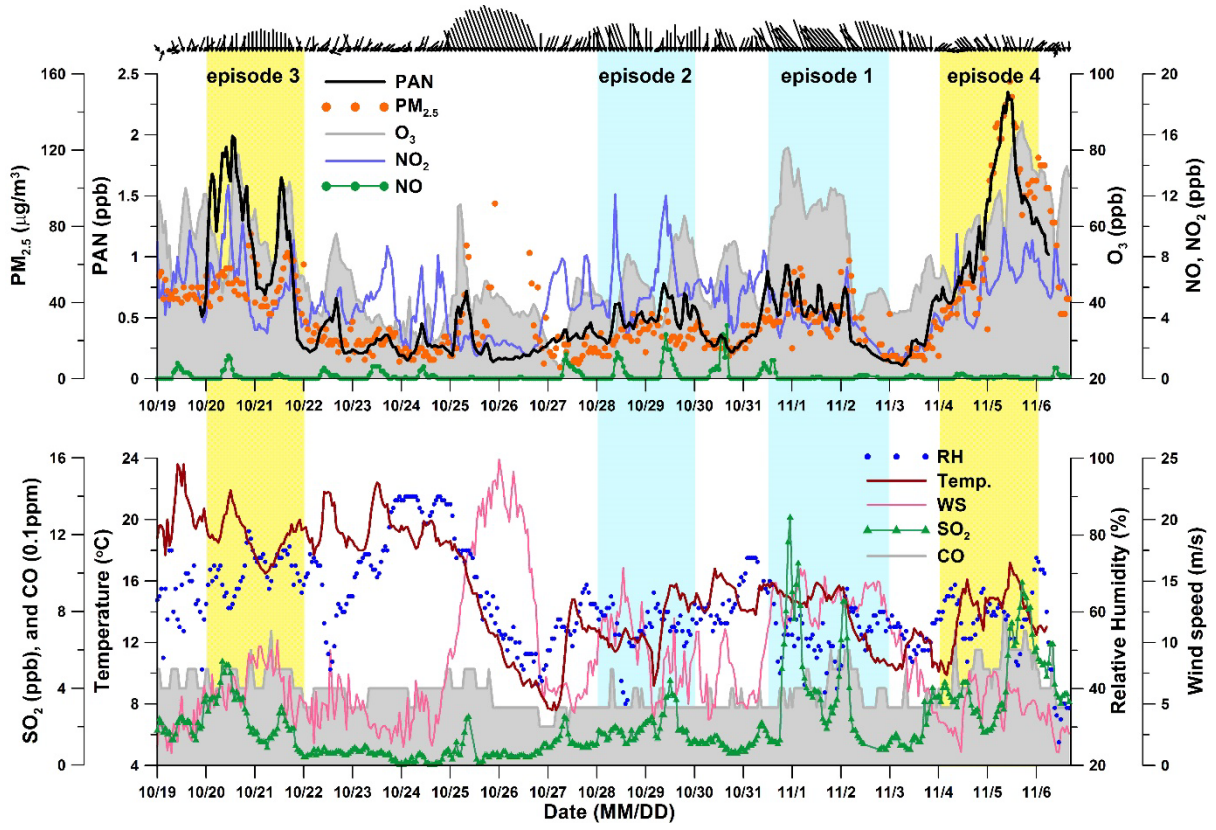

682

683 Figure 1.

684

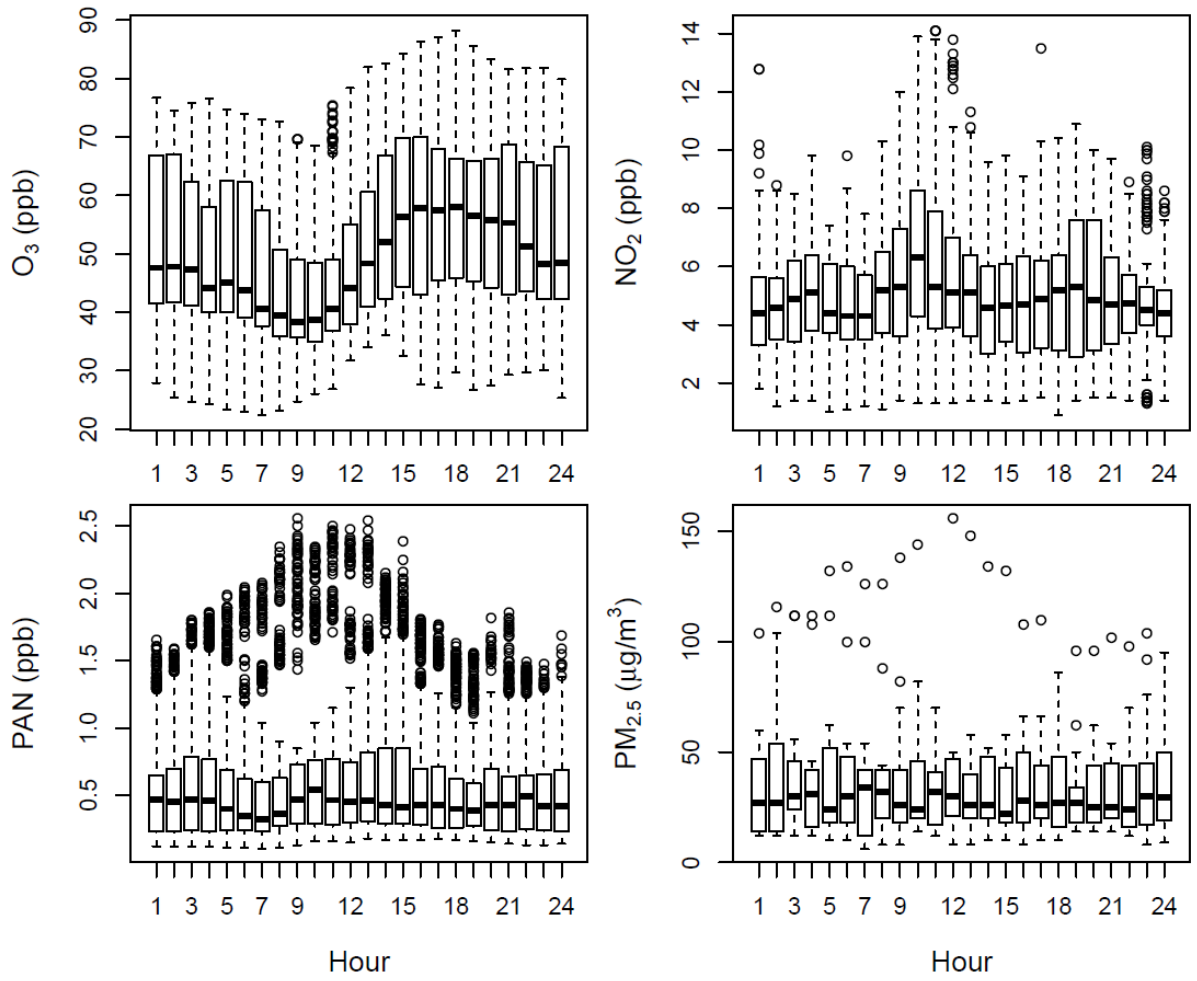

685

686 Figure 2.

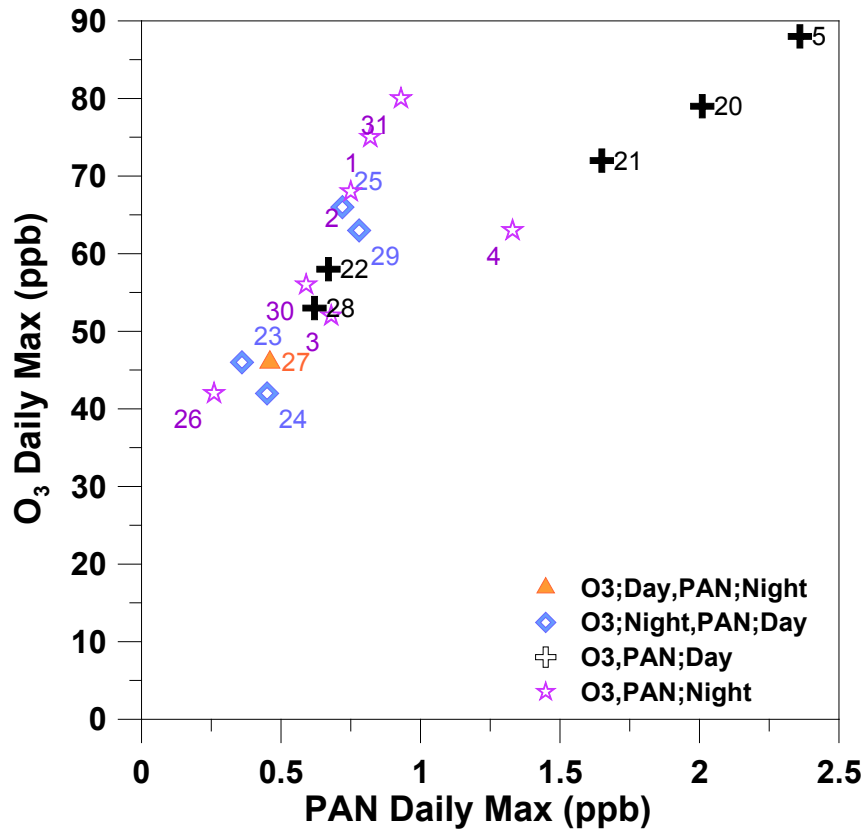

687

688 Figure 3.

+

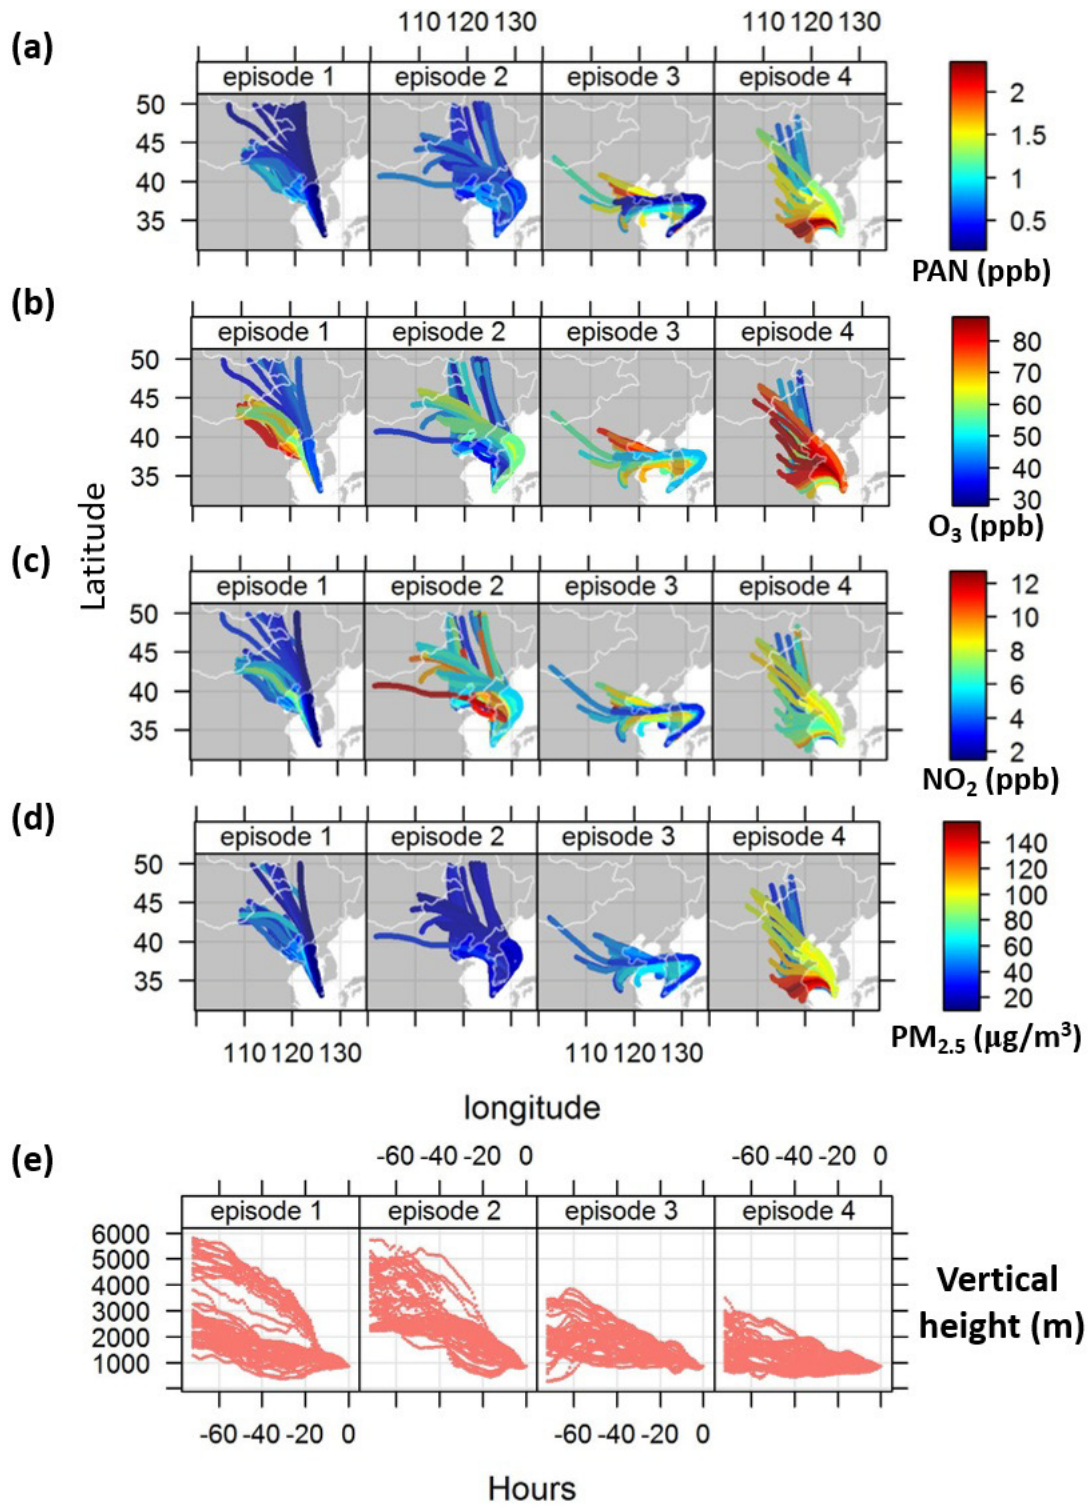

689

690 Figure 4.

691

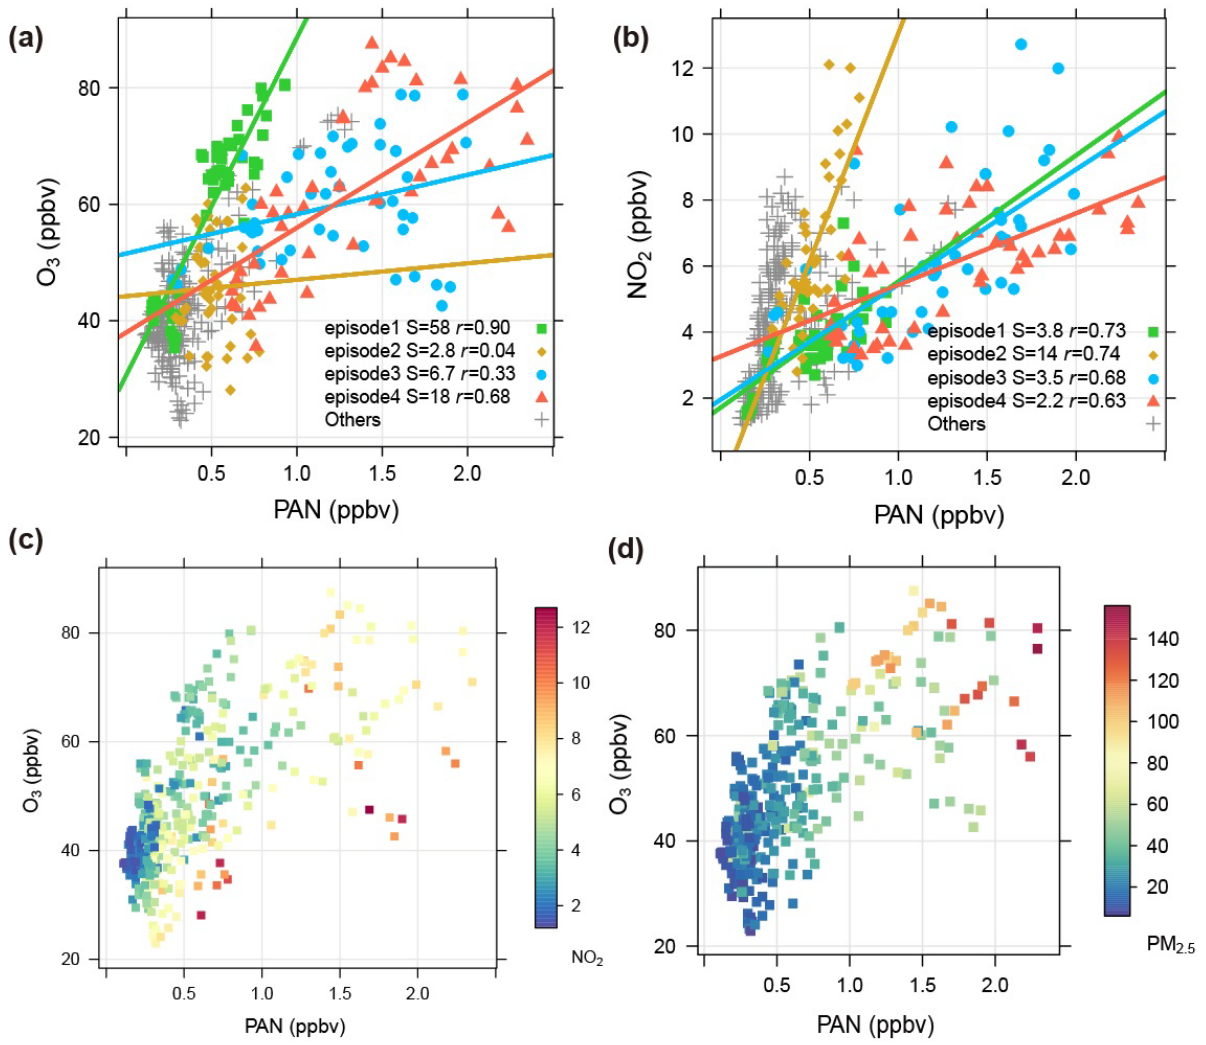

692

693 Figure 5.

694

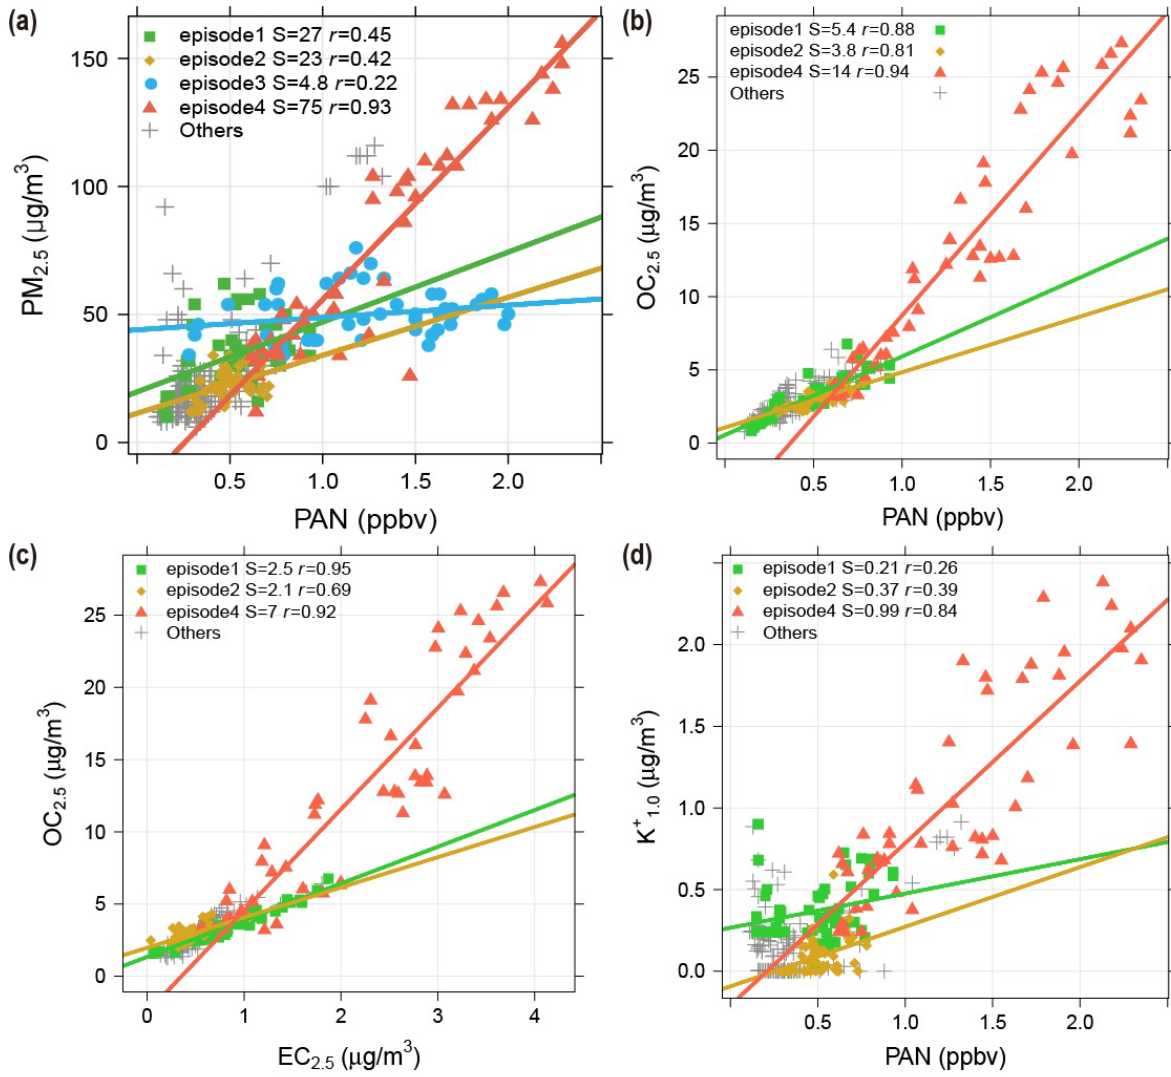

695

696 Figure 6.



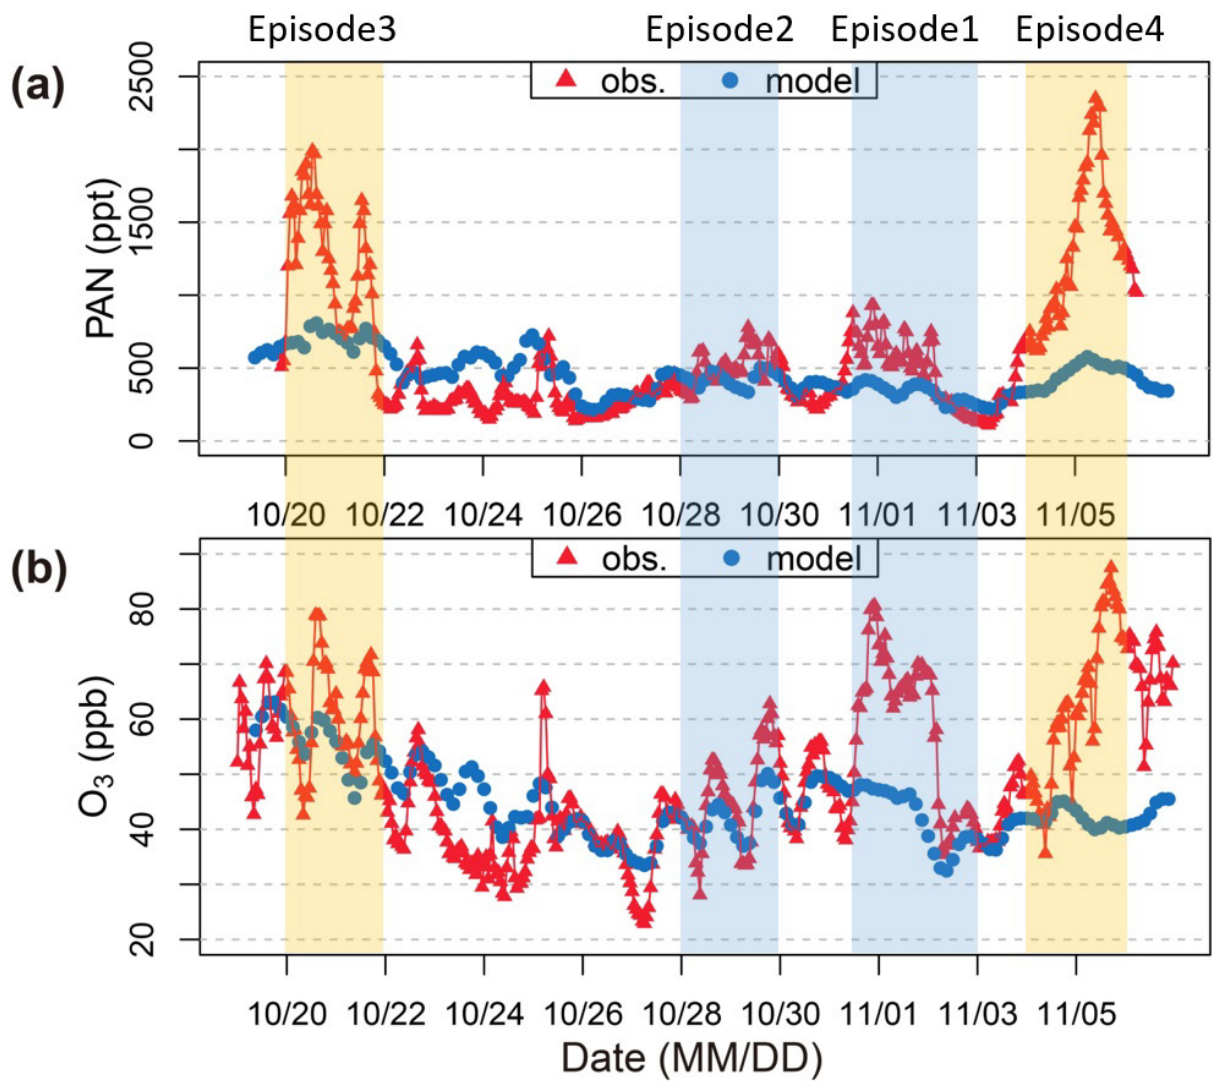

697

698 Figure 7.
